1 **Full Title:**

2  
3 **Synthetic Heparan Sulfate Mimetic Pixatimod (PG545) Potently Inhibits SARS-CoV-2 By**  
4 **Disrupting The Spike-ACE2 interaction**

5  
6 **Short title:**

7  
8 **Heparan Sulfate Mimetic Pixatimod Potently Inhibits SARS-CoV-2**

9  
10  
11 **Authors**

12 Scott E. Guimond<sup>1,†</sup>, Courtney J. Mycroft-West<sup>1,†</sup>, Neha S. Gandhi<sup>2,†</sup>, Julia A. Tree<sup>3,†</sup>, Karen R.  
13 Buttigieg<sup>3</sup>, Naomi Coombes<sup>3</sup>, Michael J. Elmore<sup>3</sup>, Kristina Nyström<sup>4</sup>, Joanna Said<sup>4</sup>, Yin Xiang  
14 Setoh<sup>5,6</sup>, Alberto A. Amarilla<sup>5,6</sup>, Naphak Modhiran<sup>5,6</sup>, Julian D.J. Sng<sup>5,6</sup>, Mohit Chhabra<sup>5,6</sup>, Daniel  
15 Watterson<sup>5,6</sup>, Paul R. Young<sup>5,6</sup>, Alexander A. Khromykh<sup>5,6</sup>, Marcelo A. Lima<sup>1</sup>, Edwin A. Yates<sup>7</sup>,  
16 Richard Karlsson<sup>8</sup>, Yen-Hsi Chen<sup>8</sup>, Yang Zhang<sup>8</sup>, Edward Hammond<sup>9</sup>, Keith Dredge<sup>9</sup>, Miles W.  
17 Carroll<sup>3,‡</sup>, Edward Trybala<sup>4,‡</sup>, Tomas Bergström<sup>4,‡</sup>, Vito Ferro<sup>5,6,‡</sup>, Mark A. Skidmore<sup>1,‡</sup> and Jeremy  
18 E. Turnbull<sup>7,8,‡\*</sup>

19  
20  
21 <sup>1</sup>Molecular & Structural Biosciences, School of Life Sciences, Keele University, Newcastle-Under-  
22 Lyme, Staffordshire, ST5 5BG, UK.

23 <sup>2</sup>School of Chemistry and Physics, Centre for Genomics and Personalized Health, Queensland  
24 University of Technology, 2 George Street, Brisbane, QLD 4000, Australia.

25 <sup>3</sup>National Infection Service, Public Health England, Porton Down, Salisbury, Wiltshire, England,  
26 UK, SP5 3NU.

27 <sup>4</sup>Department of Infectious Diseases, Institute of Biomedicine, University of Gothenburg,  
28 Guldhedsgatan 10B, S-413 46 Goteborg, Sweden

29 <sup>5</sup>School of Chemistry and Molecular Biosciences, the University of Queensland, Brisbane, QLD  
30 4072, Australia.

31 <sup>6</sup>Australian Infectious Diseases Research Centre, the University of Queensland, Brisbane, QLD  
32 4072, Australia.

33 <sup>7</sup>Department of Biochemistry and Systems Biology, Institute of Systems, Molecular and Integrative  
34 Biology, University of Liverpool, Liverpool, L69 7ZB, UK.

35 <sup>8</sup>Copenhagen Center for Glycomics, Department of Cellular & Molecular Medicine, University of  
36 Copenhagen, Copenhagen N 2200, Denmark.

37 <sup>9</sup>Zucero Therapeutics Ltd, 1 Westlink Court, Brisbane, Queensland 4076, Australia.

38  
39 <sup>†</sup>These authors contributed equally

40 <sup>‡</sup>Equal senior authors

41 <sup>\*</sup>Corresponding author: [j.turnbull@liverpool.ac.uk](mailto:j.turnbull@liverpool.ac.uk); +44 (0)151 795 4427

## 44 **Summary**

45  
46 Heparan sulfate (HS) is a cell surface polysaccharide recently identified as a co-receptor with the  
47 ACE2 protein for recognition of the S1 spike protein on SARS-CoV2 virus, revealing an attractive  
48 new target for therapeutic intervention. Clinically-used heparins demonstrate relevant inhibitory  
49 activity, but world supplies are limited, necessitating a synthetic solution. The HS mimetic  
50 pixatimod is synthetic drug candidate for cancer with immunomodulatory and heparanase-  
51 inhibiting properties. Here we show that pixatimod binds directly to the SARS-CoV-2 spike protein  
52 receptor binding domain (S1-RBD), altering its conformation and destabilizing its structure.  
53 Molecular modelling identified a binding site overlapping with the ACE2 receptor site. Consistent  
54 with this, pixatimod inhibits binding of S1-RBD to ACE2-expressing cells and displays a direct  
55 mechanism of action by inhibiting binding of S1-RBD to human ACE2. Assays with four different  
56 clinical isolates of live SARS-CoV-2 virus show that pixatimod potently inhibits infection of Vero  
57 cells at doses well within its safe therapeutic dose range. This demonstration of potent anti-SARS-  
58 CoV-2 activity establishes that synthetic HS mimetics can target the HS-Spike protein-ACE2 axis.  
59 Together with other known activities of pixatimod our data provides a strong rationale for its further  
60 investigation as a potential multimodal therapeutic to address the COVID-19 pandemic.

61  
62 *198 words*

## 63 64 65 **Introduction**

66  
67 The coronavirus-19 disease (COVID-19) pandemic caused by the severe acute respiratory  
68 syndrome coronavirus 2 (SARS-CoV-2) has according to the World Health Organisation already  
69 surpassed 38 million cases and 1 million deaths world-wide. Given the severe pathophysiology  
70 induced by SARS-CoV-2 (1), the need for therapeutic alternatives to alleviate and stop the COVID-  
71 19 epidemic is clear. Heparan sulfate (HS) is a highly sulfated glycosaminoglycan found on the  
72 surface of most mammalian cells which is used by many viruses as an entry receptor or co-receptor  
73 (2), including coronaviruses (3). Various compounds that mimic cellular HS such as clinically-used  
74 heparins have been investigated and have been shown to block infectivity and cell-to-cell spread in  
75 a multitude of different viruses, including SARS-associated coronavirus strain HSR1 (4). The  
76 glycosylated spike (S) protein of SARS-CoV-2 mediates host cell invasion via binding to a receptor  
77 protein, angiotensin-converting enzyme 2 (ACE2) (5). Analysis of the sequence and experimentally  
78 determined structures of the S protein reveals that the receptor binding domain (RBD) of the S1  
79 subunit contains a HS binding site. Recent studies have clearly demonstrated binding of heparin  
80 and HS to S1 RBD (6-9), including induction of significant conformational change in the S1 RBD  
81 structure (6), and also revealed that HS is a co-receptor with ACE2 for SARS-CoV2 (10).  
82 Collectively these data strongly suggest that blocking these interactions with heparins and HS  
83 mimetics has potential as an effective strategy for COVID-19 therapy. Although heparins have  
84 major potential for repurposing for such applications, limitations in the global supply of natural  
85 product heparins will greatly restrict its availability (11), highlighting an urgent need to find  
86 synthetic alternatives.

87

88 Pixatimod (PG545) is a clinical-stage HS mimetic with potent anti-cancer (12,13), and anti-  
89 inflammatory properties (14). However, significant antiviral and virucidal activity for pixatimod  
90 has also been reported against a number of viruses that use HS as an entry receptor with EC<sub>50</sub>'s  
91 ranging from 0.06 to 14 µg/mL. This includes HSV-2 (15), HIV (16), RSV (17), Ross River,  
92 Barmah Forest, Asian CHIK and chikungunya viruses (18), and Dengue virus (19). *In vivo* efficacy  
93 has been confirmed in a prophylactic mouse HSV-2 genital infection model (15), a prophylactic  
94 Ross River virus mouse model (18) and a therapeutic Dengue virus mouse model (19). Pixatimod  
95 has been evaluated in a Phase Ia clinical trial in patients with advanced solid tumours where it  
96 demonstrated a tolerable safety profile and some evidence of disease control (13). It has been safely  
97 administered to over 80 patients pancreatic or bowel cancers in a Phase Ib study in combination  
98 with nivolumab (ACTRN12617001573347), prompting us to examine its anti-viral activity against  
99 SARS-CoV-2.

100  
101 Here we provide evidence of a direct interaction of pixatimod with the S1 spike protein RBD,  
102 supported by molecular modelling data. Pixatimod was also able to inhibit the interaction of S1-  
103 RBD with ACE2 and also Vero cells (which are known to express the ACE2 receptor), indicating  
104 a direct mechanism of action. Finally we established that pixatimod is a potent inhibitor of  
105 attachment and invasion of Vero cells by multiple clinical isolates of live SARS-CoV-2 virus, and  
106 reduces its cytopathic effect, at concentrations within the known therapeutic range of this drug. Our  
107 data demonstrate that synthetic HS mimetics can target the HS-Spike protein-ACE2 axis, and  
108 provide strong support for clinical investigation of the potential of pixatimod as a novel therapeutic  
109 intervention for prophylaxis and treatment of COVID-19.

## Results

### Modelling of pixatimod-spike protein interactions

We initially used molecular dynamics (MD) simulations to map the potential binding sites of pixatimod (**Fig 1A**) on the S1 RBD surface (**Fig 1B**). A total of 24 unique residues of RBD were identified to be interacting with several residues of ACE2 based on the X-ray structures (**Fig 1B**). Amino acids making significant interactions with pixatimod were identified on the basis of their individual contributions to the total interaction energy, considering only the residues that contribute less than -1.0 kcal/mol. A number of these residues (Tyr489, Phe456, Leu455, Ala475) are also involved in binding to ACE2. The decomposition approach was helpful for locating residues of the RBD domain such as Lys458, Ser459, Lys462 and Asn481 that transiently interact to form hydrogen bonds or ionic interactions with the sulfated tetrasaccharide of pixatimod (**Fig 1D**). The free energy of binding is -10 kcal/mol, wherein van der Waals energies make the major favourable contribution to the total free energy. The cholesterol residue formed stabilizing interactions with Tyr489, Phe456, Tyr473, Ala475, Gln474 and Leu455 (**Fig 1E**). Furthermore, the standard deviation of backbone RMSD around residues Leu455-Pro491 and the N-terminal of RBD (Thr333-Thr345) among the four repeated MD trajectories were approximately 2Å, indicating significant conformational change in the region. RMSF calculations of main-chain atoms showed significant atomic fluctuations ( $\geq 1.5$  Å) for Lys458, Asn460, Lys462, Arg466, Ser477 and Asn481 upon binding to the ligand pixatimod. These results indicate that a conformational change may be induced by binding of pixatimod to S1 RBD (**Fig 1C**).

An alternate heparin binding site is reported around residues Arg403, Arg406, Arg408, Gln409, Lys417, Gln493, Gln498 (8). One of the replicates indicated a second binding mode wherein the tetrasaccharide of pixatimod was found to interact around this region (Supplementary Materials, **Fig S1**), however, the free energy of binding was  $> +13$  kcal/mol indicating much less favourable binding to this site. Overall, our modelling data strongly support the notion of direct binding of pixatimod to S1 RBD, potentially resulting in induction of a conformational change and interference with binding to ACE2.

151

**A**

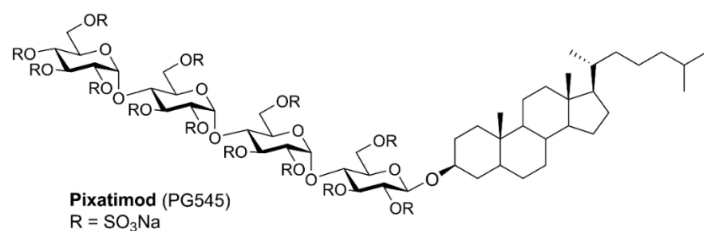

152

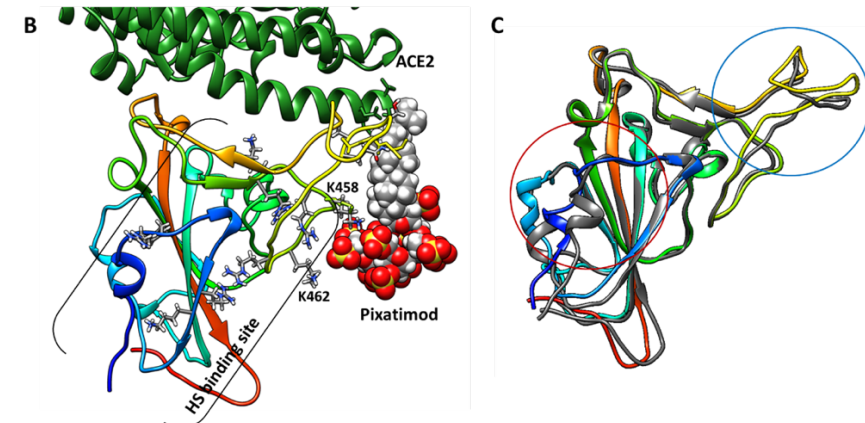

153

154

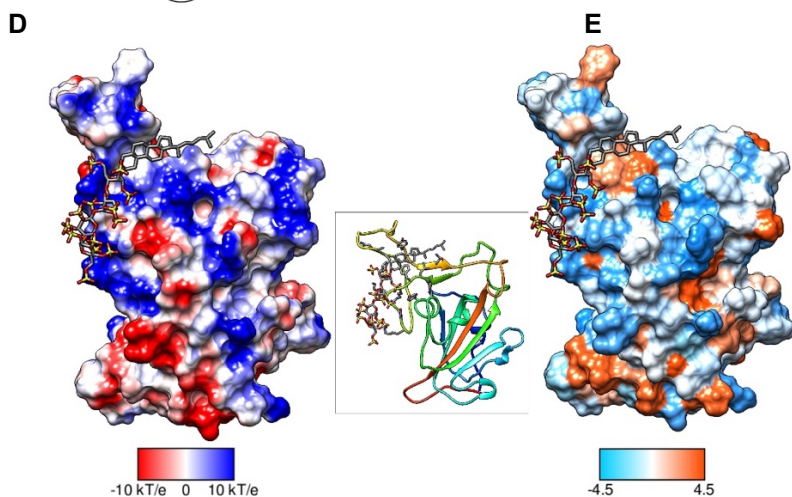

155

156

157

158

159

160

161

162

163

164

165

166

167

168

169

170

171

172

173

174

**Figure 1: Molecular dynamics modelling defines direct interactions of pixatimod with S1 RBD:** A, Structure of pixatimod. B, Model showing interactions of pixatimod with the RBD domain of spike protein. The sulfated tetrasaccharide partially occupies the HS/heparin binding site. The lipophilic tail of pixatimod wraps around the hydrophobic loop, thereby creating a steric clash with the helix of ACE2 protein (shown in inset-green ribbon). C, Superimposition of the X-ray structure (PDB: 6LZG) and one of the snapshots from MD simulations (ligand not shown) suggest conformational change around the loop region (blue circle) and the N-terminal helix as highlighted (red circle). D, coulombic surface and E, hydrophobic surface binding mode of pixatimod to S1 RBD. Both surfaces are oriented in the same direction as shown in the ribbon diagram of the protein in the middle. The sulfated tetrasaccharide interacts with the basic regions on S1 RBD whereas cholesterol residue prefers hydrophobic region for interactions. Coulombic surface coloring defaults:  $\epsilon = 4r$ , thresholds  $\pm 10$  kcal/mol were used. Blue indicates surface with basic region whereas red indicates negatively charged surface. The hydrophobic surface was colored using the Kyte-Doolittle scale wherein blue, white and orange red colour indicates most hydrophilicity, neutral and hydrophobic region, respectively. UCSF Chimera was used for creating surfaces and rendering the images. Hydrogens are not shown for clarity.

### 175 **Pixatimod interacts with spike protein**

176 Spectroscopic studies with circular dichroism (CD) allow investigation of direct binding of  
177 compounds to recombinant spike protein receptor binding domain (S1 RBD), the region which  
178 interacts with the ACE2 receptor on human cells. CD spectroscopy in the far UV region ( $\lambda = 190 -$   
179  $260$  nm) detects conformational changes in protein secondary structure that occur in solution and  
180 can infer binding by an added ligand. Such secondary structural changes can be quantified using  
181 spectral deconvolution. SARS-CoV-2 EcS1-RBD underwent conformational change in the  
182 presence of either pixatimod or heparin as a comparator sulfated molecule known to bind the RBD  
183 (*6-10*), consisting of decreased  $\alpha$ -helical content for pixatimod and increased  $\alpha$ -helical content for  
184 heparin (**Fig 2C**). A decrease in global  $\beta$ -sheet content is observed for both pixatimod and heparin,  
185 along with increases in turn structure (**Fig 2C**).  
186

187 We explored the effects of pixatimod on protein stability using differential scanning fluorimetry  
188 (DSF) in which the thermal denaturation of a protein is monitored in the presence of a hydrophobic  
189 fluorescent dye (20). Binding of pixatimod induced a notably large reduction in melting temperature  
190 ( $\Delta T_m$ ) of  $9.1^\circ\text{C}$  (**Fig 2D**;  $p=0.0001$ ), indicating major destabilisation of the mammalian expressed  
191 S1-RBD (mS1 RBD) protein. In contrast, heparin at an equivalent dose only partially destabilised  
192 the RBD protein, evidenced by a small side peak shifted by  $\sim 5-6^\circ\text{C}$  indicating populations of RBD  
193 in a bound and unbound state (**Fig 2D**).

194 The observed changes demonstrate that the SARS-CoV-2 S1 RBD interacts with pixatimod in  
195 aqueous conditions of physiological relevance. Notably, the conformational changes and  
196 destabilization observed were distinct for pixatimod compared to heparin, suggesting distinct  
197 interactions (**Fig 2**). Consistent with the modelling results, these data confirm direct interactions of  
198 pixatimod with S1 RBD, resulting in induction of a conformational change, consistent with the  
199 notion that HS mimetics such as pixatimod have the potential to interfere with S1-RBD interactions  
200 with ACE2.  
201  
202

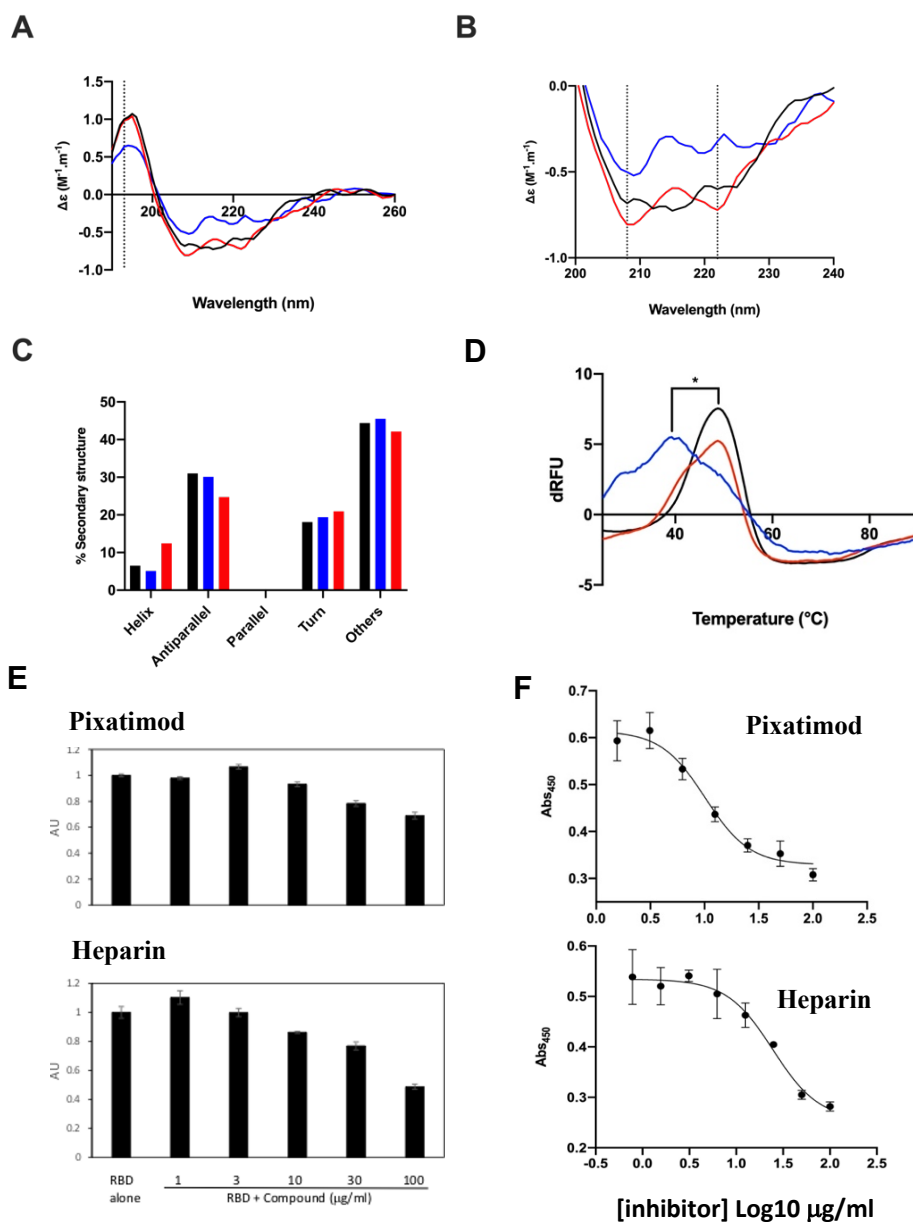

**Figure 2: Pixatimod interacts with SARS-CoV-2 S1-RBD and inhibits binding to cells and ACE2 receptor.** **A**, Circular dichroism spectra (190 - 260 nm) of SARS-CoV-2 EcS1-RBD alone (black), or with heparin (red) or pixatimod (blue). The vertical dotted line indicates 193 nm. **B**, The same spectra expanded between 200 and 240 nm. Vertical dotted lines indicate 222 nm and 208 nm. **C**, Secondary structure content analysed using BeStSel for SARS-CoV-2 EcS1-RBD.  $\alpha$ -helical secondary structure is characterized by a positive band at  $\sim$ 193 nm and two negative bands at  $\sim$ 208 and  $\sim$ 222 nm (analysis using BeStSel was performed on smoothed data between 190 and 260 nm). **D**, Differential scanning fluorimetry of binding of pixatimod (blue; 10  $\mu$ g) or heparin (red; 10  $\mu$ g) to mS1-RBD (1  $\mu$ g; black line, protein-only control). \* $T_m$  values for RBD alone (48.4  $^{\circ}$ C, SD = 0.3) and in the presence of PG545 (39.3  $^{\circ}$ C, SD = 1) were statistically different,  $t(4) = 15.25$ ,  $p = 0.0001$ . **E**, dose response effects of pixatimod (E) and unfractionated porcine mucosal heparin (F) on binding of EcS1-RBD to Vero cells. Data were normalised to control with no addition of EcS1-RBD. AU, arbitrary units of fluorescence.  $n=3$  +/- CV. **F**, Competitive ELISA assay using biotinylated human ACE2 protein immobilized on streptavidin coated plates, to measure inhibition of binding of mS1-RBD to in the presence of various concentrations of inhibitor compounds. Pixatimod (IC<sub>50</sub>, 10.1  $\mu$ g/ml) and porcine mucosal heparin (IC<sub>50</sub>, 24.6  $\mu$ g/ml).  $n=3$ , +/-SD; representative example shown.

### 237 **Pixatimod inhibits S1-RBD cell-binding**

238 We next evaluated inhibition of binding of His-tagged EcS1-RBD to monkey Vero cells (which are  
239 known to express both HS proteoglycans (HSPGs) and the ACE2 protein receptor required for  
240 SARS-CoV-2 attachment and cell invasion). Fixed cells were exposed to His-tagged S1 RBD for  
241 1hr, in the presence or absence of additional compounds, with subsequent washing and detection  
242 using a fluorescently-labelled anti-His tag antibody. A clear dose response was noted for both  
243 pixatimod and heparin as a comparator compound (**Fig 2E**), with 32% and 51% inhibition achieved  
244 at 100 µg/mL respectively. These data confirm that pixatimod can interfere with binding of S1-  
245 RBD to cells containing HSPGs and ACE2 protein receptors.

### 248 **Pixatimod inhibits S1-RBD binding to ACE2**

249 To further evaluate the mechanism of action of pixatimod its direct effects on the interaction of S1-  
250 RBD with the ACE2 protein receptor was measured using a competitive ELISA assay. Inhibition  
251 of binding of mS1-RBD preincubated with various concentrations of inhibitor compounds was  
252 measured by detection with an anti-RBD antibody. A dose response was observed with pixatimod  
253 showing an IC<sub>50</sub> of 10.1 µg/ml (**Fig 2F**). In comparison heparin also demonstrated inhibitory  
254 activity but with lower potency (24.6 µg/ml; **Fig 2F**). Importantly, this data confirms a direct  
255 mechanism of action of pixatimod via inhibition of S1-RBD binding to the ACE2 protein receptor.

### 257 **Pixatimod inhibits SARS-CoV-2 infection**

258 The effect of pixatimod on SARS-CoV-2 infection of Vero cells was examined using a standard  
259 plaque reduction neutralisation assay. Pixatimod was pre-incubated with the SARS-CoV-2 clinical  
260 isolate from Victoria, Australia (VIC01) for 1 hr before infecting the cells. Significant decreases  
261 were observed in the number of PFU upon pixatimod treatment for SARS-CoV-2 (**Fig 3A**).  
262 Analysis of multiple dose response curves yielded an EC<sub>50</sub> for pixatimod in the range of 2.4-13.8  
263 µg/mL (mean 8.1 µg/ml; n=3 assays) (**Table 1**). In comparison, an EC<sub>50</sub> of ~10 µg/ml has been  
264 observed for unfractionated heparin with a SARS-CoV-2 Italy UniSR1/2020 isolate (8) and 20-64  
265 µg/ml for the SARS-CoV-2 Victoria isolate (21).

266  
267  
268  
269  
270  
271  
**A**

**B**



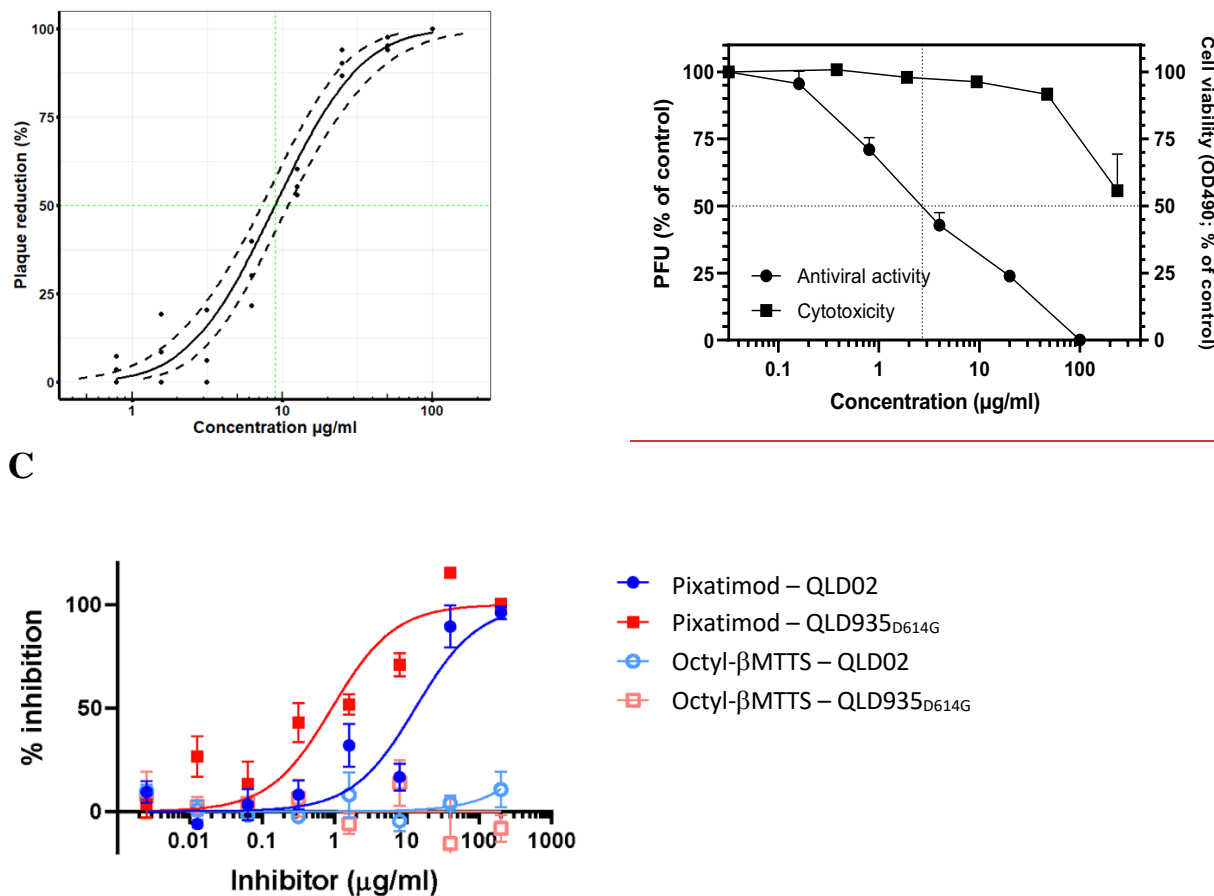

272 **Figure 3: Pixatimod inhibits attachment and invasion of Vero cells by live SARS-CoV-2 virus isolates.** Live virus  
 273 infectivity assays were performed as described in Methods for 3 different SARS-CoV-2 isolates (representative data  
 274 shown). A, Plaque reduction neutralization assay of Victoria isolate (VIC01) with a Probit mid-point analysis curve  
 275  $\pm$ 95% confidence intervals (dashed lines) (EC<sub>50</sub> 8.9 µg/ml; 95% CI, 7-11; n=3). B, Plaque reduction assay of DE isolate,  
 276 EC<sub>50</sub> 2.7 µg/ml; n=3, +/- SD. C, Cytopathic assay of Queensland isolates, EC<sub>50</sub> 13.2 (QLD02) and 0.9 (QLD935 with  
 277 D614G mutation) µg/ml n=6, +/- SEM. Representative examples are shown in each case. Results of pixatimod  
 278 inhibition of SARS-CoV-2 infectivity are expressed as percent plaque reduction (A), plaque number as a percent of  
 279 control (B), or percent inhibition from cytopathic effect (C). Panel B also shows cytotoxicity data for Vero cells  
 280 for calculation of CC<sub>50</sub> value (>236 µg/ml). In panel C, data is also shown for octyl β-maltotetraoside tridecasulfate (Octyl-  
 281 βMTTS; Supplementary Materials Fig S2), an analogue of pixatimod which lacks the steroid side-chain.

282  
 283 To establish that these antiviral effects were relevant for wider clinical viral isolates, assays were  
 284 conducted with the isolate DE-Gbg20 from Sweden in a plaque reduction assay. Pixatimod  
 285 inhibited infectivity of the DE-Gbg20 isolate with an EC<sub>50</sub> value of 2.7 µg/mL (**Fig 3B**), similar to  
 286 that found in experiments with the VIC01 isolate. Analysis of pixatimod cytotoxicity for Vero cells  
 287 using a tetrazolium-based assay revealed that pixatimod decreased by 50% (CC<sub>50</sub>) the viability of  
 288 Vero cells at concentration >236 µg/mL, i.e., well above the EC<sub>50</sub> values observed in the plaque  
 289 reduction assay (**Fig. 3B; Table 1**). Selectivity index (SI) values for pixatimod ranged from >17 to  
 290 >98 for these assays.

297 **Table 1: Anti-SARS-CoV-2 activities of pixatimod in Vero cells.**  
298

| SARS-CoV-2 isolate | Assay Method      | EC <sub>50</sub> (µg/mL) <sup>a</sup> | CC <sub>50</sub> (µg/mL) | Selectivity Index <sup>a</sup> |
|--------------------|-------------------|---------------------------------------|--------------------------|--------------------------------|
| Victoria isolate   | Plaque reduction  | 8.1 ± 3.1 (2.4-13.8) <sup>a</sup>     | >236 <sup>d</sup>        | 29 (>17 to >98 <sup>a</sup> )  |
| DE-Gbg20 isolate   | Plaque reduction  | 2.7 <sup>b</sup>                      |                          | >87                            |
|                    | Cytopathic effect | (0.8 – 11.6) <sup>c</sup>             |                          | >20 to >295                    |
| QLD02 isolate      | Cytopathic effect | 13.2 (8.0 – 21.6)                     |                          | >17                            |
| QLD935 isolate     | Cytopathic effect | 0.9 (0.4 – 1.9)                       |                          | >200                           |

299

300 <sup>a</sup> Mean values and individual assay result ranges, and resulting selectivity index ranges, in brackets.

301 <sup>b</sup> Mean EC<sub>50</sub> ±1SE based on the data from three independent virus plaque reduction assays (PRNT<sub>50</sub> values).

302 <sup>c</sup> EC<sub>50</sub> computed by the Reed and Muench formula based on the cytopathic effect assay. Range indicates upper  
303 (complete protection of cells) and lower (partial protection) limits of EC<sub>50</sub> estimation.

304 <sup>d</sup> Cytotoxicity in Vero cells (determined at University of Gothenburg).  
305

306

307

308 In addition to the plaque reduction assays pixatimod inhibition of SARS-CoV-2 infectivity was  
309 assessed using assays that measured the cytopathic effects of the virus as an endpoint. Using the  
310 Swedish DE-Gbg20 isolate, and two Australian isolates from Queensland (QLD02 and QLD935),  
311 the EC<sub>50</sub>s for pixatimod inhibition of SARS-CoV-2 infectivity were determined to be 0.8-11.6, 10.6  
312 and 0.9 µg/mL, respectively (**Table 1**), values were comparable with those observed for the plaque  
313 reduction assays (**Table 1**). We also noted that a pixatimod analogue octyl β-maltotetraoside  
314 tridecasulfate (without the steroid side-chain) (**Fig S2**) lacked efficacy for both QLD02 and  
315 QLD935 isolates (**Fig 3C**), demonstrating the importance of the steroid side-chain for activity.  
316 Notably, both DE-Gbg20 and QLD935 isolates contain the D614G mutation of the spike protein  
317 commonly present in recent isolates (Table S1) (22). The QLD935 isolate exhibited lower  
318 cytopathicity, which could partially contribute to the observed lower EC<sub>50</sub> for pixatimod against  
319 this isolate.  
320

## 321 **Discussion**

322

323 The current COVID-19 pandemic illustrates the critical need to develop effective vaccines and  
324 therapeutics for emerging viruses and established antiviral agents appear to have limited utility  
325 against SARS-CoV-2. Owing to their use as a means of cell attachment by many viruses, HS  
326 represents an ideal broad-spectrum antiviral target (2). Binding of a viral protein to cell-surface HS  
327 is often the first step in a cascade of interactions that is required for viral entry and the initiation of  
328 infection (23). As HS and heparin contain the same saccharide building blocks and HS-binding  
329 proteins also interact with heparin, this drug is gaining attention (apart from its anticoagulant  
330 properties) in COVID-19 treatment (23). Here we demonstrate a direct mechanism of action of  
331 pixatimod and heparin on attenuating S1-RBD binding to ACE2. These data are supported by recent  
332 studies on heparin using native mass spectrometry (24), and also demonstrate the ability of HS  
333 mimetics to inhibit S1-RBD binding.  
334

335 Heparin has been shown to inhibit binding of SARS-CoV-2 spike protein to a human cell line (25),  
336 and to inhibit entry into human cells of pseudovirus carrying the SARS-CoV-2 spike protein

(10,26). However, the question of whether therapeutic doses of heparins are effective for COVID-19 patients as an antiviral treatment awaits the outcome of clinical trials; bleeding complications are possible (27), though non-anticoagulant heparin or HS preparations could be deployed that reduce cell binding and infectivity without a risk of causing bleeding (9,10). However, HS mimetics offer additional advantages in comparison to heparin beyond simply reducing anticoagulant activity (9), most notably their ready availability at scale via synthetic chemistry production that addresses the well-known fragility of the heparin supply chain (11). As a clinical-stage HS mimetic, pixatimod provides better control over structure, molecular weight diversity (a single molecular entity), sulfation, purity and stability. Herein, we reveal a direct interaction of the clinical candidate pixatimod with the S1 spike protein RBD, supported by molecular modelling data. Pixatimod also inhibited the interaction of S1 RBD with Vero cells which express the ACE2 receptor. Moreover, infectivity assays, of two types (plaque reduction and cytopathic effect, Table 1) confirm pixatimod is a potent inhibitor of SARS-CoV-2 infection of Vero cells, at concentrations ranging from 0.8 to 13.8  $\mu\text{g}/\text{mL}$  which are well within its known therapeutic range. Interestingly, we noted that the lipophilic steroid side chain of pixatimod was critical for its potency and is predicted from modelling to interact with S1-RBD. This unique feature, making it an unusual amphiphilic HS mimetic, has also been shown to confer virucidal activity against Herpes Simplex virus by disruption of the viral lipid envelope (15).

Pixatimod has only mild anti-coagulant activity, and has been administered i.v. to over 80 cancer patients, being well tolerated with predictable pharmacokinetics (PK) and no reports of heparin-induced thrombocytopenia (12). Further, cytotoxicity *in vitro* is low; we observed a  $\text{CC}_{50} > 100 \mu\text{M}$  ( $> 236 \mu\text{g}/\text{mL}$ ) in Vero cells, consistent with cytotoxicity data on human cells (28). Importantly, the maximum plasma concentration ( $\text{C}_{\text{max}}$ ) of pixatimod following a single treatment of 100 mg in cancer patients is  $29.5 \mu\text{g}/\text{mL}$  with a  $\text{C}_{\text{min}}$  of  $2.7 \mu\text{g}/\text{mL}$  measured one week following treatment (12), indicating that an equivalent dosing regimen should be sufficient to achieve antiviral activity in human subjects. The low anticoagulant activity of pixatimod is an advantage since it could be used as a direct antiviral agent in combination therapies with heparin, which are being used to treat coagulopathies observed in COVID-19 patients (29). It was also encouraging that pixatimod inhibition of multiple clinical isolates of SARS-CoV-2 was noted, demonstrating potential for widespread effectiveness. Presence of multiple binding sites for pixatimod in the Spike protein would suggest robustness against mutations that may arise later in pandemic and/or in the following coronavirus outbreaks. While recent widespread isolates with D614G spike mutants appear to be 2-3 fold more sensitive to the antiviral activity of pixatimod, caution needs to be taken in interpreting the data of the cytopathicity assay used to determine this activity as 614G isolates (at least QLD935) exhibited lower cytopathicity than 614D isolates.

It is notable that there are multiple potential mechanisms of action of pixatimod against SARS-CoV-2 (summarised in **Fig 4**), including direct inhibition of HS-S1-ACE2 interactions but also immunomodulatory effects which may alleviate some of the immunopathologies associated with moderate-severe COVID-19 patients. Pixatimod also inhibits the pro-inflammatory enzyme heparanase (28) and has been demonstrated to suppress IL-6 in inflammatory (pancreatitis) and viral (Ross River virus) animal models (14, 18). Moreover, it blocks the heparanase-dependent invasion of macrophages into tumours in mouse cancer models (29) which may be relevant to

381 invasion of monocytes and macrophages into the lungs associated with severe COVID-19 disease  
382 (30), representing an immunopathology potentially responsive to agents such as pixatimod.  
383 Vaccinia virus has recently been shown to rely on host heparanase to degrade HS in order to spread  
384 to distant sites (31), revealing a role for heparanase in the progression of disease that may also apply  
385 for SARS-CoV2 in COVID-19. Notably, increased plasma heparanase activity is associated with  
386 COVID-19 (32). Thus additional beneficial effects of pixatimod might be anticipated from its  
387 heparanase inhibitory properties.

388  
389 Based on the data presented here, pixatimod has potent antiviral activity against SARS-CoV-2 at  
390 therapeutically relevant concentrations in addition to its known heparanase-inhibitory and  
391 immunomodulatory properties which may further support the host response to COVID-19 infection.  
392 Collectively this provides a strong rationale to justify entry of pixatimod to clinical trials for  
393 COVID-19.

394  
395  
396

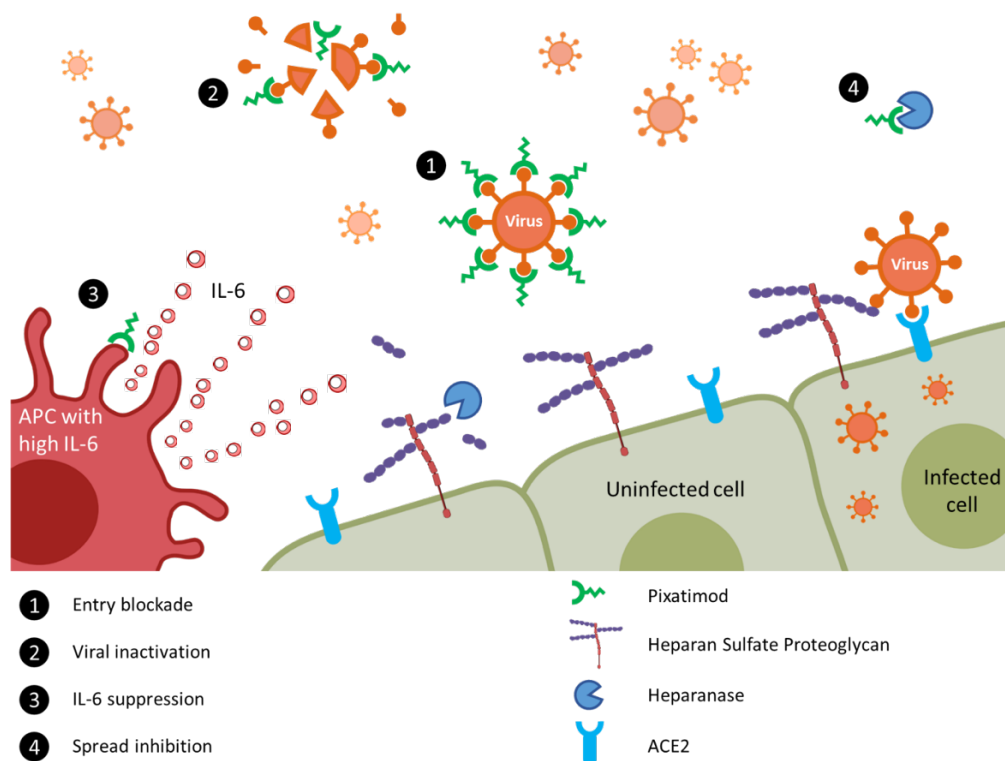

397  
398

399 **Figure 4: Proposed multi-mode mechanisms of pixatimod activity against SARS-CoV-2 and other viruses.** The  
400 principal mode of action demonstrated here is that pixatimod acts as a decoy receptor [1], blocking S1-RBD binding to  
401 HS co-receptors and inhibiting viral attachment to host cells, thus blocking viral infection. Additional potential modes  
402 of action include: [2] virucidal activity of pixatimod, dependent upon the cholestanol moiety (15), which may lead to  
403 degradation and permanent inactivation of SARS-CoV-2 virus particles; [3] suppression of IL-6 secretion by antigen  
404 presenting cells, primarily macrophages (14); and [4] blocking viral escape from host cell by inhibiting heparanase  
405 which otherwise promotes viral escape by cleaving HS receptors (31, 32).

406  
407  
408

## 409 **Materials and Methods**

410 **Computational methods:** The crystal structure of the RBD-ACE2 complex (PDB ID: 6LZG, Wang  
411 et al, 2020) was retrieved from the RCSB Protein Data Bank. Structures were stripped of water  
412 molecules, ACE2 chain and any cofactors and/or ligands present. UCSF Chimera was used to edit  
413 the structure and for visualisation. Without prior knowledge of the pixatimod binding site, one  
414 molecule of the ligand was placed in the simulation system containing the protein, solvent and ions  
415 and molecular dynamics (MD) simulations were performed for 600 ns using the AMBER16  
416 package. Such unguided simulations, as reviewed before (33), have been used to predict the binding  
417 sites on a protein's surface and drive the design of new ligands. All the MD simulations were carried  
418 out using the pmemd.cuda module (34) of the AMBER 16 molecular dynamics package and the  
419 analyses were performed using the cpptraj module of AmberTools16 (35). Simulation systems were  
420 set up by placing the spike RBD domain at the centre of the octahedral simulation box (with an  
421 extension of at least 12 Å from each side). Pixatimod was randomly placed in the box. This was  
422 followed by addition of TIP3P water (36) and Na<sup>+</sup> ions for neutralising the charge of the system.  
423 Proteins were parameterized using the Amber99SB-ildn force field (37) whereas Glycam-06  
424 (version j) (38) and Lipid14 (39) force fields were used for the sulfated tetrasaccharide and  
425 cholesterol moieties of pixatimod, respectively. Four replicates of the unguided simulations were  
426 performed (4 × 600 ns). Periodic boundary conditions were applied, and the time step was set to 2  
427 fs. The electrostatic energy was calculated with the particle mesh Ewald (PME) method. SHAKE  
428 constraints were applied on the bonds involving hydrogen. A cut-off of 12 Å was applied to the  
429 Lennard-Jones and direct space electrostatic interactions with a uniform density approximation  
430 included to correct for the long-range van der Waals interactions.

431 The system was first minimized without electrostatics for 500 steps, then with a restraint of 25  
432 kcal/(mol Å<sup>2</sup>) applied on the protein and pixatimod. This minimization was followed by 100-ps  
433 MD simulation with 25 kcal/(mol Å<sup>2</sup>) positional restraints applied on the protein and ligand, and  
434 the temperature was slowly increased from 0 to 300 K. Then, followed by 500 steps of steepest  
435 descent cycles followed by 500 steps of conjugate gradient minimization, and 50-ps equilibrations  
436 with a restraint force constant of 5 kcal/(mol Å<sup>2</sup>) in the protein and ligand, followed by final 2 ns  
437 equilibration without restraints to equilibrate the density. The first few steps were all carried out at  
438 constant volume followed by at least 600 ns production MD simulation at 300 K (Langevin  
439 dynamics, collision frequency: 5/ps) with 1-atm constant pressure. Trajectories were collected and  
440 data analyses such as RMSD, RMSF and free energy of binding were performed on the last 30000  
441 frames. The binding free energy and pairwise residue contributions (40) were calculated using the  
442 Molecular mechanics-Generalized Born (GB) equation (MM/GBSA) procedure implemented in  
443 AmberTools16. The details of this method have been extensively reviewed (41). The polar  
444 solvation energy contribution was calculated by using GB<sup>OBC II</sup> (igb= 5) (42). The value of the  
445 implicit solvent dielectric constant and the solute dielectric constant for GB calculations was set to  
446 80 and 1, respectively. The solvent probe radius was set to 1.4 Å as default. The entropy calculation  
447 is computationally expensive and therefore not performed for the purposes of this study.

448 **Expression of His-tagged recombinant SARS-CoV-2 S1 RBD in E coli:** Residues 330–583 of the  
449 SARS-CoV-2 spike protein (GenBank: MN908947) were cloned upstream of a N-terminal

450 6XHisTag in the pRSETA expression vector and transformed into SHuffle® T7 Express Competent  
451 *E. coli* (NEB, UK). Protein expression was carried out in MagicMedia™ *E. coli* Expression Media  
452 (Invitrogen, UK) at 30°C for 24 hrs, 250 rpm. The bacterial pellet was suspended in 5 mL lysis  
453 buffer (BugBuster Protein Extraction Reagent, Merck Millipore, UK; containing DNase) and  
454 incubated at room temperature for 30 mins. Protein was purified from inclusion bodies using IMAC  
455 chromatography under denaturing conditions. On-column protein refolding was performed by  
456 applying a gradient with decreasing concentrations of the denaturing agent (from 8M Urea). After  
457 extensive washing, protein was eluted using 20 mM NaH<sub>2</sub>PO<sub>4</sub>, pH 8.0, 300 mM NaCl, 500 mM  
458 imidazole. Fractions were pooled and buffer-exchanged to phosphate-buffered saline (PBS; 140  
459 mM NaCl, 5 mM NaH<sub>2</sub>PO<sub>4</sub>, 5 mM Na<sub>2</sub>HPO<sub>4</sub>, pH 7.4; Lonza, UK) using Sephadex G-25 media (GE  
460 Healthcare, UK). Recombinant protein (termed EcS1-RBD) was stored at -4°C until required.

461 **Expression of S1-RBD in mammalian cells:** Secreted RBD-SD1 (termed mS1-RBD) was  
462 transiently produced in suspension HEK293-6E cells. A plasmid encoding RBD-SD1, residues  
463 319–591 of 2019-nCoV S were cloned upstream of a C-terminal HRV3C protease cleavage site, a  
464 monomeric Fc tag and an His<sub>8x</sub> Tag were a gift from Jason S. McLellan, University of Texas at  
465 Austin. Briefly, 100 mL of HEK293-6E cells were seeded at a cell density of 0.5 × 10<sup>6</sup> cells/ml  
466 24hr before transfection with polyethyleneimine (PEI). For transfection, 100 µg of the ACE2  
467 plasmid and 300 µg of PEI (1:3 ratio) were incubated for 15 min at room temperature. Transfected  
468 cells were cultured for 48 hr and fed with 100 mL fresh media for additional 48 hr before harvest.  
469 RBD-SD1 was purified by HiTrap Protein G HP column (GE Healthcare, US) pre-equilibrated in  
470 PBS and eluted with 0.1M glycine (pH 2.7). Purity of proteins was evaluated by Coomassie staining  
471 of SDS-PAGE gels, and proteins were quantified by BCA Protein Assay Kit (Thermo Scientific).

472 **Secondary structure determination of SARS-CoV-2 S1 RBD by circular dichroism spectroscopy:**  
473 The circular dichroism (CD) spectrum of the SARS-CoV-2 S1 RBD in PBS was recorded using a  
474 J-1500 Jasco CD spectrometer (Jasco, UK), Spectral Manager II software (JASCO, UK) using a  
475 0.2 mm path length, quartz cuvette (Hellma, USA). All spectra were obtained using a scanning of  
476 100 nm/min, with 1 nm resolution throughout the range  $\lambda = 190 - 260$  nm and are presented as the  
477 the mean of five independent scans, following instrument calibration with camphorsulfonic acid.  
478 SARS-CoV-2 S1 RBD was buffer-exchanged (prior to spectral analysis) using a 10 kDa Vivaspin  
479 centrifugal filter (Sartorius, Germany) at 12,000 g, thrice and CD spectra were collected using 21  
480 µL of a 0.6 mg/mL solution in PBS, pH 7.4. Spectra of heparin (unfractionated porcine mucosal  
481 heparin, Celsus) were collected in the same buffer at approximately comparable concentrations,  
482 since this is a polydisperse material. Collected data were analysed with Spectral Manager II  
483 software prior to processing with GraphPad Prism 7, using second order polynomial smoothing  
484 through 21 neighbours. Secondary structural prediction was calculated using the BeStSel analysis  
485 server (43).

486 To ensure that the CD spectral change of SARS-CoV-2 S1 RBD in the presence of pixatimod did  
487 not arise from the addition of the compound alone, a difference spectrum was analysed. The  
488 theoretical CD spectrum that resulted from the arithmetic addition of the CD spectrum of the SARS-  
489 CoV-2 S1 RBD and that of pixatimod differed from the observed experimental CD spectrum of  
490 SARS-CoV-2 S1 RBD mixed with compound alone. This demonstrates that the change in the CD

491 spectrum arose from a conformational change following binding to pixatimod (Supplementary  
492 Materials, Fig S3).

493 **Differential scanning fluorimetry:** Differential scanning fluorimetry (DSF) was conducted on  
494 mammalian expressed mS1-RBD (1  $\mu$ g) in PBS pH 7.6 and 1.25 X Sypro Orange (Invitrogen) to  
495 a total well volume of 40  $\mu$ L in 96-well qPCR plates (AB Biosystems). Unfractionated porcine  
496 mucosal Heparin (Celsus) or pixatimod (10  $\mu$ g) were introduced to determine the effect on the  
497 thermal stability of, mS1-RBD using an AB biosystems StepOne plus qPCR machine, employing  
498 the TAMRA filter setting. Melt curve experiments were performed following a 2-minute initial  
499 incubation at 25  $^{\circ}$ C, with succeeding 0.5  $^{\circ}$ C increments every 30 s up to a final temperature of  
500 90 $^{\circ}$ C. Control wells containing H<sub>2</sub>O, heparin or pixatimod (10  $\mu$ g) without mS1-RBD (1 $\mu$ g) also  
501 employed to ensure a change in the melt curve was solely a result of protein-ligand interactions and  
502 interactions with Sypro Orange. Smoothed first derivative plots (9 neighbours, 2<sup>nd</sup>-order  
503 polynomial, Savitzky-Golay) were constructed using Prism 8 (GraphPad). T<sub>m</sub> values were  
504 calculated using MatLab software (R20018a, MathWorks) and  $\Delta$ T<sub>m</sub> values determined from the  
505 difference between the T<sub>m</sub> of RBD alone or in the presence of heparin or pixatimod.

506 **Cell binding of S1 RBD:** African green monkey Vero kidney epithelial cells (Vero E6) were  
507 purchased from ATCC. Cells were maintained at 50-75% confluence in DMEM supplemented  
508 with 10% foetal bovine serum, 20 mM L-glutamine, 100 U/mL penicillin-G and 100 U/mL  
509 streptomycin sulfate (all purchased from Gibco/ThermoFisher, UK). Cells were maintained at 37  
510  $^{\circ}$ C, in 5% CO<sub>2</sub> and plated into 96-well cell culture plates at 1000 cells/well in 100  $\mu$ L of  
511 maintenance medium. Cells were allowed to adhere overnight. Medium was aspirated and wells  
512 were washed 3x with 200  $\mu$ L calcium, magnesium-free PBS (CMF-PBS, Lonza, UK). Cells were  
513 fixed with 100  $\mu$ L 10% neutral buffered Formalin (Thermofisher, UK) for 10 minutes at room  
514 temperature, then washed 3x with 200  $\mu$ L CMF-PBS. 100  $\mu$ L CMF-PBS was added to each well  
515 and plates were stored at 4  $^{\circ}$ C until use. Before use, wells were blocked with 200  $\mu$ L CMF-PBS +  
516 1% BSA (Sigma-Roche, UK) for 1 hour at room temperature, and washed 3x with 200  $\mu$ L CMF-  
517 PBS + 0.1% Tween-20 (PBST, Sigma-Roche, UK) followed by 2x with 200  $\mu$ L CMF-PBS.

518 His-tagged S1-RBD (50  $\mu$ g/mL) and compounds at indicated concentrations were added to each  
519 well in 25  $\mu$ L PBST + 0.1% BSA as indicated. Wells were incubated for 1 hour at room temperature  
520 with rocking. Wells were washed 3x with 200  $\mu$ L PBST and 2x with 200  $\mu$ L CMF-PBS. Binding  
521 of His-tagged S1-RBD was detected with Alexa Fluor 488 anti-his tag antibody (clone J095G46,  
522 Biologend, UK) 1:5000 in 25  $\mu$ L PBST + 0.1% BSA per well. Wells were incubated in the dark  
523 for 1 hour at room temperature with rocking. Wells were washed 3x with 200  $\mu$ L PBST and 2x  
524 with 200  $\mu$ L CMF-PBS. Fluorescence was read at Ex. 485:Em 535 on a Tecan Infinite M200Pro  
525 plate reader. Results are presented as normalized mean (where 0 is the fluorescence without added  
526 S1-RBD, and 1 is the fluorescence with 50  $\mu$ g/mL S1-RBD;  $\pm$  %CV, n=3).

527  
528 **Competition ELISA for S1 RBD binding to ACE2:** High binding 96 well plates (Greiner) were  
529 coated with 3  $\mu$ g/mL streptavidin (Fisher) in 50 mM sodium carbonate buffer pH 9.6 (50  $\mu$ L/ well)  
530 for 1 hour at 37  $^{\circ}$ C. Plates were washed 3 times with 300  $\mu$ L PBS, 0.2% Brij35 (PBSB) and blocked  
531 with 300  $\mu$ L PBSB + 1% casein for 1 hour at 37  $^{\circ}$ C. Plates were washed a further 3 times with 300

532  $\mu\text{L}$  PBSB prior to the addition of 100 ng/mL Biotinylated ACE2 (Sino Biological) in PBSB + 1%  
533 casein (50  $\mu\text{L}$ / well) and incubated for 1 hour at 37 °C. Plates were again washed 3 times with 300  
534  $\mu\text{L}$  PBSB prior to the addition of 50  $\mu\text{L}$ /well mS1-RBD (5  $\mu\text{g}$ /mL) in PBSB + 1% casein, which had  
535 been pre-incubated for 30 minutes at room temperature with or without varying concentrations of  
536 heparin or pixatimod (100- 0.7  $\mu\text{g}$ /mL) in separate tubes. Plates were incubated for 1 hour at 37 °C  
537 to allow for mS1-RBD-ACE2 binding and were subsequently washed with 300  $\mu\text{L}$ /well PBSB.  
538 Bound mS1-RBD was detected by incubation with 0.5  $\mu\text{g}$ /mL Rabbit-SARS-CoV-2 (2019-nCoV)  
539 Spike RBD Antibody (Stratech) in PBSB + 1% casein (50  $\mu\text{L}$ /well) for 1 hour at 37 °C. Following  
540 a further 3 washes with PBSB plates were incubated for 30 minutes at 37 °C with horseradish  
541 peroxidase conjugated Donkey anti-Rabbit IgG diluted 1:1000, v/v in PBSB + 1% casein  
542 (Bioledgend). Plates were washed a final 5 times with 300  $\mu\text{L}$  PBSB before being developed for 10  
543 minutes with 3,3',5,5'- tetramethylbenzidine prepared according to the manufacturer's instructions  
544 (Fisher). Reactions were stopped by the addition of 20  $\mu\text{L}$  2M  $\text{H}_2\text{SO}_4$  and plates were read at  $\lambda = 450$   
545 nm using a Tecan Infinite M200 Pro multi-well plate reader (Tecan Group). Control wells  
546 containing no biotinylated ACE2 were employed to ensure binding was specific.

#### 547 ***Live SARS-CoV-2 virus assays:***

549 SARS-CoV-2 Victoria isolate (GISAID accession, EPI\_ISL\_406844): a plaque reduction assay was  
550 performed with the SARS-CoV-2 Victoria/01/2020 (passage 3) isolate, generously provided by The  
551 Doherty Institute, Melbourne, Australia at P1, was diluted to a concentration of  $1.4 \times 10^3$  pfu/mL  
552 (70 pfu/50  $\mu\text{L}$ ) in minimal essential media (MEM) (Life Technologies, California, USA) containing  
553 1% (v/v) foetal calf serum (FCS) (Life Technologies) and 25 mM HEPES buffer (Sigma) and mixed  
554 50:50 with pixatimod dilutions, in a 96-well V-bottomed plate. The plate was incubated at 37 °C in  
555 a humidified box for 1 hour to allow the virus to be exposed to pixatimod. The virus-compound  
556 mixture was transferred onto the wells of a washed 24-well plate that had been seeded with Vero  
557 E6 cells [ECACC 85020206] the previous day at  $1.5 \times 10^5$  cells/well. The virus-compound mixture  
558 was left to adsorb for an hour at 37°C, then plaque assay overlay media was applied (MEM  
559 containing 1.5% carboxymethylcellulose (Sigma, Dorset, UK), 4% (v/v) FCS and 25 mM HEPES  
560 buffer). After incubation at 37 °C in a humidified box, for 5 days, plates were fixed overnight with  
561 20% (v/v) formalin/PBS, washed with tap water and then stained with methyl crystal violet solution  
562 (0.2% v/v) (Sigma) and plaques were counted. Compound dilutions were performed in either  
563 duplicate or quadruplicate. Compound dilutions and cells only were run in duplicate, to determine  
564 if there was any cell cytotoxicity. A mid-point probit analysis (written in R programming language  
565 for statistical computing and graphics) was used to determine the amount ( $\mu\text{g}$ /mL) required to  
566 reduce SARS-CoV-2 viral plaques by 50% (PRNT50) compared with the virus only control  
567 (n=5). An internal positive control for the PRNT assay was run in triplicate using a sample of heat-  
568 inactivated human MERS convalescent serum known to neutralise SARS-CoV-2 (National Institute  
569 for Biological Standards and Control, UK).

570  
571 SARS-CoV-2 DE-Gbg20 isolate (GISAID accession under application): Plaque reduction assay  
572 for SARS-CoV-2 clinical isolate DE-Gbg20 from Sweden was performed in a similar manner,  
573 except for the virus and the pixatimod (fivefold decreasing concentrations at a range 100-0.16  
574  $\mu\text{g}$ /ml) were diluted in DMEM supplemented with 2% heat-inactivated FCS, and 100 U of penicillin  
575 and 60  $\mu\text{g}$ /ml of streptomycin (DMEM-S). The virus (100 PFU) and pixatimod (fivefold decreasing



576 concentrations at a range 100 – 0.16 µg/ml) were mixed and incubated for 30 min in humidified  
577 atmosphere comprising 5% CO<sub>2</sub> (CO<sub>2</sub> incubator). The mixtures were then transferred to Vero cells  
578 (ATCC CCL-81) and following incubation with cells for 90 min in the CO<sub>2</sub> incubator, the  
579 methylcellulose overlay was added. Three separate experiments each with duplicates were  
580 performed.

581 A cytopathic effect assay was performed with the SARS-CoV-2 DE-Gbg20 isolate and Vero cells  
582 (ATCC) plated at 2 x 10<sup>4</sup> per well in 96-well plates the day prior to the experiment. Serial fivefold  
583 dilutions of pixatimod in DMEM supplemented with 2% heat-inactivated FCS, and 100 U of  
584 penicillin and 60 µg/mL of streptomycin (DMEM-S) were incubated with 100 TCID<sub>50</sub> of SARS-  
585 CoV-2 isolate DE for 20 min in humidified atmosphere comprising 5% CO<sub>2</sub> (CO<sub>2</sub> incubator). The  
586 final concentrations of pixatimod were in a range 0.075 µg/mL to 47.2 µg/mL. The cells were  
587 rinsed once with 50 µL of DMEM-S, and then 200 µL of the virus-pixatimod mixtures were added  
588 to each well with cells (in quadruplicates). After incubation of the virus-pixatimod mixtures with  
589 cells for 3 days in the CO<sub>2</sub> incubator, the cells were inspected under a microscope for the presence  
590 of virus induced cytopathic effect where complete protection of cells were denoted as “+” while a  
591 partial protection (~50% of cells showing no cytopathic effect) was recorded as “+/-“. The 50% end-  
592 point (EC<sub>50</sub>) was computed by the Reed and Muench method.

593  
594 SARS-CoV-2 QLD02 (GISAID accession EPI\_ISL\_407896) and QLD935 (GISAID accession  
595 EPI\_ISL\_436097) clinical isolates from Australia: A cytopathic effect assay was carried out as  
596 described above for the DE-Gbg20 isolate, with 10 ffu/well and 3 days incubation. In this assay,  
597 Vero E6 cells were plated at 2 x 10<sup>4</sup> per well in 96-well plates the day prior to experiment. Serial  
598 five-fold dilutions of pixatimod in DMEM supplemented with 2% heat-inactivated FCS, and 100  
599 U of penicillin and 60 µg/mL of streptomycin (DMEM-S) were incubated with 10 foci forming  
600 units of SARS-CoV-2 QLD02 or QLD935 isolate and incubated for 30 min in humidified  
601 atmosphere comprising 5% CO<sub>2</sub> (CO<sub>2</sub> incubator). The cells were rinsed once with 50 µL of DMEM-  
602 S, and then 200 µL of the virus-pixatimod mixtures were added to each well with cells (in  
603 triplicates). After incubation of the virus-pixatimod mixtures with cells for 3 days in the CO<sub>2</sub>  
604 incubator, the cells were fixed with 4% PFA and then stained with crystal violet. Then crystal violet  
605 was released by methanol and OD at 595nm was measured to quantify cell viability (protection  
606 from infection). The EC<sub>50</sub> was then calculated using GraphPad Prism.

607  
608 **Cytotoxicity assays:** The assay was performed as described by Lundin *et al.* (2012). Briefly, Vero  
609 cells (ATCC, 2 x 10<sup>4</sup> cells/well) were seeded in 96 well cluster plates to become nearly confluent  
610 at the day of the experiment. The cell growth medium was then removed and 100 µL of serial  
611 fivefold dilutions of pixatimod in DMEM-S (ranging from 0.09 to 236 µg/mL) were added to cells.  
612 Following incubation of cells with pixatimod for 3 days in the CO<sub>2</sub> incubator, 20 µL of the MTS  
613 salt containing CellTiter 96 Aqueous One Solution reagent (Promega, Madison, WI) was added and  
614 incubated for further 1-2 h at 37 °C. The absorbance was recorded at 490 nm against a background  
615 of 650 nm. Two separate experiments each in duplicates were performed and the results are  
616 expressed as percentage of absorbance value detected with pixatimod relative to control cells.

617 **Statistical analysis:** Experimental data are presented as means ± SD, SEM or CV as noted.  
618 Statistical analyses were performed using analysis of a two-tailed Student's *t* test with GraphPad

519 Prism (GraphPad Software) unless otherwise noted. Differences were considered statistically  
520 significant if the *P* value was less than 0.05.

521

## 522 References

523

524 1. Akhmerov, A., and Marbán, E. COVID-19 and the Heart. *Circ Res* 126, 1443-1455. (2020)

525 2. Cagno, V., Tseligka, E.D., Jones, S.T., and Tapparel, C. Heparan Sulfate Proteoglycans and  
526 Viral Attachment: True Receptors or Adaptation Bias? *Viruses* 11, 596.(2019)

527 3. Milewska, A., Zarebski, M., Nowak, P., Stozek, K., Potempa, J., and Pyrc, K. Human coronavirus  
528 NL63 utilizes heparan sulfate proteoglycans for attachment to target cells. *J Virol* 88,  
529 13221-13230.(2014)

530 4. Vicenzi, E., Canducci, F., Pinna, D., Mancini, N., Carletti, S., Lazzarin, A., Bordignon, C., Poli,  
531 G., and Clementi, M. Coronaviridae and SARS-associated coronavirus strain HSR1. *Emerg*  
532 *Infect Dis* 10, 413-418.(2004)

533 5. Hoffmann, M., Kleine-Weber, H., Schroeder, S., Krüger, N., Herrler, T., Erichsen, S.,  
534 Schiergens, T.S., Herrler, G., Wu, N.H., Nitsche, A., Müller, M.A., Drosten, C., and  
535 Pöhlmann, S. SARS-CoV-2 Cell Entry Depends on ACE2 and TMPRSS2 and Is Blocked  
536 by a Clinically Proven Protease Inhibitor. *Cell* 181, 271-280.e278.(2020)

537 6. Mycroft-West, C., Su, D., Elli, S., Guimond, S., Miller, G., Turnbull, J., Yates, E., Guerrini, M.,  
538 Fernig, D., Lima, M., and Skidmore, M. The 2019 coronavirus (SARS-CoV-2) surface  
539 protein (Spike) S1 Receptor Binding Domain undergoes conformational change upon  
540 heparin binding. *bioRxiv*, 2020.2002.2029.971093.(2020a)

541 7. Mycroft-West, C.J., Su, D., Li, Y., Guimond, S.E., Rudd, T.R., Elli, S., Miller, G., Nunes, Q.M.,  
542 Procter, P., Bisio, A., Forsyth, N.R., Turnbull, J.E., Guerrini, M., Fernig, D.G., Yates, E.A.,  
543 Lima, M.A., and Skidmore, M.A. SARS-CoV-2 Spike S1 Receptor Binding Domain  
544 undergoes Conformational Change upon Interaction with Low Molecular Weight Heparins.  
545 *bioRxiv*, 2020.2004.2029.068486. (2020b)

546 8. Mycroft-West, C.J., Su, D., Pagani, I., Rudd, T.R., Elli, S., Guimond, S.E., Miller, G.,  
547 Meneghetti, M.C.Z., Nader, H.B., Li, Y., Nunes, Q.M., Procter, P., Mancini, N., Clementi,  
548 M., Forsyth, N.R., Turnbull, J.E., Guerrini, M., Fernig, D.G., Vicenzi, E., Yates, E.A., Lima,  
549 M.A., and Skidmore, M.A. Heparin inhibits cellular invasion by SARS-CoV-2: structural  
550 dependence of the interaction of the surface protein (spike) S1 receptor binding domain with  
551 heparin. *Thrombosis and Haemostasis*. (in press) *bioRxiv*, 2020.2004.2028.066761.(2020c)

552 9. Liu, L., Chopra, P., Li, X., Wolfert, M.A., Tompkins, S.M., and Boons, G.J. SARS-CoV-2  
553 spike protein binds heparan sulfate in a length- and sequence-dependent manner. *bioRxiv*.  
554 doi.org/10.1101/2020.05.10.087288 (2020)

555 10. Clausen, T.M., Sandoval, D.R., Spliid, C.B., Pihl, J., Painter, C.D., Thacker, B.E., .....Esko,  
556 J.D. SARS-CoV-2 Infection Depends on Cellular Heparan Sulfate and ACE2. *Cell*,  
557 doi.org/10.1016/j.cell.2020.09.033 (2020)

558 11. Vilanova, E., Tovar, A.M.F., and Mourão, P.a.S. Imminent risk of a global shortage of heparin  
559 caused by the African Swine Fever afflicting the Chinese pig herd. *J Thromb Haemost* 17,  
560 254-256.(2019)

561 12. Ferro, V., Liu, L., Johnstone, K.D., Wimmer, N., Karoli, T., Handley, P., Rowley, J., Dredge,  
562 K., Li, C.P., Hammond, E., Davis, K., Sarimaa, L., Harenberg, J., and Bytheway, I.  
563 Discovery of PG545: a highly potent and simultaneous inhibitor of angiogenesis, tumor  
564 growth, and metastasis. *J Med Chem* 55, 3804-3813.(2012)

565 13. Dredge, K., Brennan, T.V., Hammond, E., Lickliter, J.D., Lin, L., Bampton, D., Handley, P.,  
566 Lankesheer, F., Morrish, G., Yang, Y., Brown, M.P., and Millward, M. A Phase I study of

- 567 the novel immunomodulatory agent PG545 (pixatimod) in subjects with advanced solid  
568 tumours. *Br J Cancer* 118, 1035-1041. (2018)
- 569 14. Khamaysi, I., Singh, P., Nasser, S., Awad, H., Chowers, Y., Sabo, E., Hammond, E., Gralnek,  
570 I., Minkov, I., Nosedá, A., Ilan, N., Vlodavsky, I., and Abassi, Z. The Role of Heparanase  
571 in the Pathogenesis of Acute Pancreatitis: A Potential Therapeutic Target. *Sci Rep* 7, 715.  
572 (2017)
- 573 15. Said, J.S., Trybala, E., Görander, S., Ekblad, M., Liljeqvist, J., Jennische, E., Lange, S., and  
574 Bergström, T. The Cholesterol-Conjugated Sulfated Oligosaccharide PG545 Disrupts the  
575 Lipid Envelope of Herpes Simplex Virus Particles. *Antimicrob Agents Chemother* 60, 1049-  
576 1057.(2016)
- 577 16. Said, J., Trybala, E., Andersson, E., Johnstone, K., Liu, L., Wimmer, N., Ferro, V., and  
578 Bergström, T. Lipophile-conjugated sulfated oligosaccharides as novel microbicides against  
579 HIV-1. *Antiviral Res* 86, 286-295.(2010)
- 580 17. Lundin, A., Bergström, T., Andrighetti-Fröhner, C.R., Bendrioua, L., Ferro, V., and Trybala, E.  
581 Potent anti-respiratory syncytial virus activity of a cholesterol-sulfated tetrasaccharide  
582 conjugate. *Antiviral Res* 93, 101-109.(2012)
- 583 18. Supramaniam, A., Liu, X., Ferro, V., and Herrero, L.J. Prophylactic Antiheparanase Activity  
584 by PG545 Is Antiviral In Vitro and Protects against Ross River Virus Disease in Mice.  
585 *Antimicrob Agents Chemother* 62(4): e.01959-17 (2018)
- 586 19. Modhiran, N., Gandhi, N.S., Wimmer, N., Cheung, S., Stacey, K., Young, P.R., Ferro, V., and  
587 Watterson, D. Dual targeting of dengue virus virions and NS1 protein with the heparan  
588 sulfate mimic PG545. *Antiviral Res* 168, 121-127.(2019)
- 589 20. Uniewicz, K.A., Orio. A., Xu. R., Ahmed. Y., Wilkinson. M., Fernig. G. D and Yates. A. E.  
590 Differential Scanning Fluorimetry Measurements of Protein Stability Changes upon  
591 Binding to Glycosaminoglycans: A Screening Test for Binding Specificity. *Anal. Chem.*  
592 82(9), 3796-3802 (2010)
- 593 21. Tree, JA., Turnbull, JE., Buttigieg, KR., Elmore, MJ., Coombes, N., Hogwood, J., Yates,  
594 EA., Gray, E., Singh, D., Wilkinson, T., Page, CP., Carroll, MW. Unfractionated heparin  
595 inhibits live wild-type SARS-CoV-2 cell infectivity at therapeutically relevant  
596 concentrations. *Authorea* DOI: 10.22541/au.159526747.71750127 (2020). *British J*  
597 *Pharmacol* (under revision)
- 598 22. Korber, B., Fischer, WM., Gnanakaran, S., Yoon, H., Theiler, J., Abfalterer, W., Hengartner,  
599 N., Giorgi, E.E., Bhattacharya, T., Foley, B., Hastie, K.M., Parker, MD., Partridge, DG.,  
700 Evans, CM., Freeman, T.M., de Silva, TI., Sheffield COVID-19 Genomics  
701 Group., McDanal, C., Perez, L.G., Tang, H., Moon-Walker, A., Whelan, SP., LaBranche,  
702 CC., Saphire, EO. and Montefiori, D.C., Tracking Changes in SARS-CoV-2 Spike:  
703 Evidence that D614G Increases Infectivity of the COVID-19 Virus. *Cell*. 182: 812–827.e19.  
704 (2020)
- 705 23. Lindahl, U., and Li, J.P. Heparin - an old drug with multiple potential targets in Covid-19  
706 therapy. *J Thromb Haemost.*(2020)
- 707 24. Yang, Y., Du, Y., and Igor A. Kaltashov, I.A. The utility of native MS for understanding the  
708 mechanism of action of repurposed therapeutics in COVID-19: heparin as a disruptor of the  
709 SARS-CoV-2 interaction with its host cell receptor. *BioRxiv*,  
710 doi.org/10.1101/2020.06.09.142794 (2020)
- 711 25. Partridge, L.J., Green, L.R., Monk, P.N. Unfractionated heparin potently inhibits the binding of  
712 SARS-CoV-2 spike protein to a human cell line. *bioRxiv*, 2020.05.21.107870 (2020)
- 713 26. Tandon, R., Sharp, J.S., Zhang, F., Pomin, V.H., Ashpole, N.M., Mitra, D., Jin, W., Liu, H.,  
714 Sharma, P., and Linhardt, R.J. Effective Inhibition of SARS-CoV-2 Entry by Heparin and  
715 Enoxaparin Derivatives. *bioRxiv*, 2020.06.08.140236 (2020)

- 716 27. Bargellini, I., Cervelli, R., Lunardi, A., Scandiffio, R., Daviddi, F., Giorgi, L., Cicorelli, A.,  
717 Crocetti, L., and Cioni, R. Spontaneous Bleedings in COVID-19 Patients: An Emerging  
718 Complication. *Cardiovasc Intervent Radiol*, 1-2. (2020)
- 719 28. Dredge, K., Hammond, E., Handley, P., Gonda, T.J., Smith, M.T., Vincent, C., Brandt, R.,  
720 Ferro, V., and Bytheway, I. PG545, a dual heparanase and angiogenesis inhibitor, induces  
721 potent anti-tumour and anti-metastatic efficacy in preclinical models. *Br J Cancer* 104, 635-  
722 642.(2011)
- 723 29. Boyango, I., Barash, U., Naroditsky, I., Li, J.P., Hammond, E., Ilan, N., and Vlodaysky, I.  
724 Heparanase cooperates with Ras to drive breast and skin tumorigenesis. *Cancer Res* 74,  
725 4504-4514.( 2014)
- 726 30. Merad, M., and Martin, J.C. Pathological inflammation in patients with COVID-19: a key role  
727 for monocytes and macrophages. *Nat Rev Immunol* 20, 355-362.(2020)
- 728 31. Khanna, M., Ranasinghe, C., Browne, A.M., Li, J.P., Vlodaysky, I., and Parish, C.R. Is host  
729 heparanase required for the rapid spread of heparan sulfate binding viruses? *Virology* 529,  
730 1-6.(2019)
- 731 32. Buijssers, B., Yanginlar, C., de Nooijer, A., Grondman, I., Maciej-Hulme, M.L., Jonkman, I.,  
732 Janssen, N.A.F., Rother, N., de Graaf, M., Pickkers, P., Kox, M., Joosten, L.A.B., Nijenhuis,  
733 T., Netea, M.G., Hilbrands, L., van de Veerdonk, F.L., Duivenvoorden, R., de Mast, Q  
734 & van der Vlag J. Increased plasma heparanase activity in COVID-19 patients. *Front.*  
735 *Immunol.* doi.org/10.3389/fimmu.2020.57047 (2020)
- 736 33. Ghanakota, P., and Carlson, H.A. Moving Beyond Active-Site Detection: MixMD Applied to  
737 Allosteric Systems. *J Phys Chem B* 120, 8685-8695.(2016)
- 738 34. Salomon-Ferrer, R., Götz, A.W., Poole, D., Le Grand, S., and Walker, R.C. Routine  
739 Microsecond Molecular Dynamics Simulations with AMBER on GPUs. 2. Explicit Solvent  
740 Particle Mesh Ewald. *Journal of Chemical Theory and Computation* 9, 3878-3888. (2013).
- 741 35. Case, D.A., Cheatham Iii, T.E., Darden, T., Gohlke, H., Luo, R., Merz Jr, K.M., Onufriev, A.,  
742 Simmerling, C., Wang, B., and Woods, R.J. The Amber biomolecular simulation programs.  
743 *Journal of computational chemistry* 26, 1668-1688. (2005).
- 744 36. Jorgensen, W.L., Chandrasekhar, J., Madura, J.D., Impey, R.W., and Klein, M.L. Comparison  
745 of simple potential functions for simulating liquid water. *The Journal of Chemical Physics*  
746 79, 926-935. (1983).
- 747 37. Lindorff-Larsen, K., Piana, S., Palmo, K., Maragakis, P., Klepeis, J.L., Dror, R.O., and Shaw,  
748 D.E. Improved side-chain torsion potentials for the Amber ff99SB protein force field.  
749 *Proteins* 78, 1950-1958. (2010).
- 750 38. Kirschner, K.N., Yongye, A.B., Tschampel, S.M., González-Outeiriño, J., Daniels, C.R., Foley,  
751 B.L., and Woods, R.J. GLYCAM06: a generalizable biomolecular force field.  
752 Carbohydrates. *J Comput Chem* 29, 622-655. (2008).
- 753 39. Madej, B.D., Gould, I.R., and Walker, R.C. A Parameterization of Cholesterol for Mixed Lipid  
754 Bilayer Simulation within the Amber Lipid14 Force Field. *J Phys Chem B* 119, 12424-  
755 12435. (2015).
- 756 40. Gohlke, H., Kiel, C., and Case, D.A. Insights into protein-protein binding by binding free energy  
757 calculation and free energy decomposition for the Ras-Raf and Ras-RalGDS complexes. *J*  
758 *Mol Biol* 330, 891-913. (2003).
- 759 41. Genheden, S., and Ryde, U. The MM/PBSA and MM/GBSA methods to estimate ligand-  
760 binding affinities. *Expert Opin Drug Discov* 10, 449-461. (2015).
- 761 42. Onufriev, A., Bashford, D., and Case, D.A. Exploring protein native states and large-scale  
762 conformational changes with a modified generalized born model. *Proteins* 55, 383-394.  
763 (2004).

764 43. Micsonai, A., Wien, F., Kernya, L., Lee, Y.H., Goto, Y., Réfrégiers, M., and Kardos, J.  
765 Accurate secondary structure prediction and fold recognition for circular dichroism  
766 spectroscopy. *Proc Natl Acad Sci U S A* 112, E3095-3103.(2015)  
767  
768

769 **Acknowledgments:** The authors would like to thank Zucero Therapeutics for provision of  
770 pixatimod (PG545) and Queensland Health Forensic & Scientific Services, Queensland Department  
771 of Health for provision of QLD02 and QLD935 SARS-CoV-2 isolates.  
772

773 **Funding:** V.F. acknowledges support from the Australian Research Council (DP170104431). TB  
774 acknowledges support of the Swedish Research Council. AAK acknowledges funding support from  
775 the Australian Infectious Diseases Research Centre. Computational (and/or data visualisation)  
776 resources and services used in this work were provided by the eResearch Office, Queensland  
777 University of Technology, Brisbane, Australia and with the assistance of resources from the  
778 National Computational Infrastructure (NCI Australia), an NCRIS enabled capability supported by  
779 the Australian Government. N.S.G. is supported through the Advance Queensland Industry  
780 Research Fellowship. M.A.S., S.E.G. and C.M-W. acknowledge support of the University of Keele  
781 and J.E.T. and E.A.Y. the support of the University of Liverpool. Z.Y. acknowledges the Danish  
782 National Research Foundation (DNRF107) and the Lundbeck Foundation, Y-H.C. the Innovation  
783 Fund Denmark and R.K. the European Commission (GlycoImaging H2020-MSCA-ITN-721297).  
784  
785

786 **Author contributions:** J.E.T., V.F., M.A.S. and K.D. conceived the project. S.E.G., C.J.M-W.,  
787 N.S.G., J.A.T., K.R.B., N.C., K.N., J.S., Y.X.S., A.A.A., N.M., J.D.J.S., M.C., D.W., P.R.Y.,  
788 A.A.K., M.A.L., E.A.Y., R.K., Y-H.C., Y.Z., E.T. and M.A.S. designed and conducted the  
789 experiments. V.F., E.H., K.D. M.W.C., T.B., M.A.S. and J.E.T. prepared the manuscript.  
790  
791

792 **Competing Interests:** E.H. and K.D. are employees of Zucero Therapeutics. V.F., E.H. and K.D.  
793 are inventors on pixatimod patents.

794 **Data and materials availability:** All data needed to evaluate the conclusions in the paper are  
795 present in the paper and/or the Supplementary Materials. Additional data related to this paper may  
796 be requested from the authors.  
797  
798

799  
300  
301  
302  
303  
304  
305  
306  
307  
308  
309  
310  
311  
312  
313  
314  
315  
316  
317  
318  
319  
320  
321  
  
322  
  
323  
  
324  
325  
326  
327  
328  
329  
330  
331  
  
332  
333  
334  
335  
336  
337  
338  
339  
340  
341

## Supplementary Materials

### The clinical-stage heparan sulfate mimetic pixatimod (PG545) potently inhibits SARS-CoV-2 virus via disruption of the Spike-ACE2 interaction

Scott E. Guimond, Courtney J. Mycroft-West, Neha S. Gandhi, Julia A. Tree, Karen R. Buttigieg, Naomi Coombes, Kristina Nyström, Joanna Said, Yin Xiang Setoh, Alberto A. Amarilla, Naphak Modhiran, De Jun Julian Sng, Mohit Chhabra, Daniel Watterson, Paul R. Young, Alexander A. Khromykh, Marcelo A. Lima, Edwin A. Yates, Richard Karlsson, Yen-Hsi Chen, Yang Zhang, Edward Hammond, Keith Dredge, Miles W. Carroll, Edward Trybala, Tomas Bergström, Vito Ferro, Mark A. Skidmore and Jeremy E. Turnbull

#### The file includes:

Table S1  
Figs. S1 to S3

**Table S1: Amino acids at position 614 in Spike protein of SARS-CoV-2 isolates**

| Isolate  | Amino acids at position 614 in Spike |
|----------|--------------------------------------|
| VIC01    | D                                    |
| QLD02    | D                                    |
| QLD935   | G                                    |
| DE-Gbg20 | G                                    |

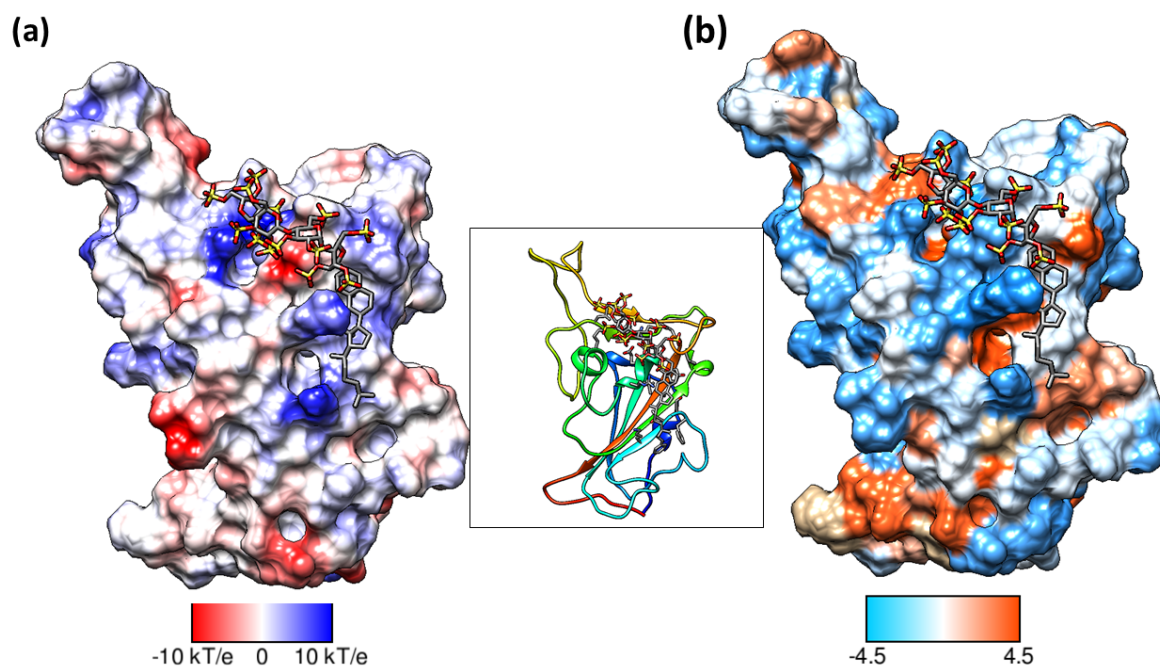

**Figure S1. An alternate binding mode of pixatimid on the S1 RBD presented an unfavourable total binding free energy.** Surfaces are oriented in the same direction as shown in the ribbon diagram in the inset. (a) Coulombic Surface Coloring defaults:  $\epsilon = 4r$ , thresholds  $\pm 10$  kcal/mol·e were used. Blue indicates surface with basic region whereas red indicates negatively charged surface. (b) The hydrophobic surface was coloured using the Kyte-Doolittle scale wherein blue, white and orange red colour indicates most hydrophilic, neutral and hydrophobic region, respectively. UCSF Chimera was used for creating surfaces and rendering the images. Hydrogens are not shown for clarity.

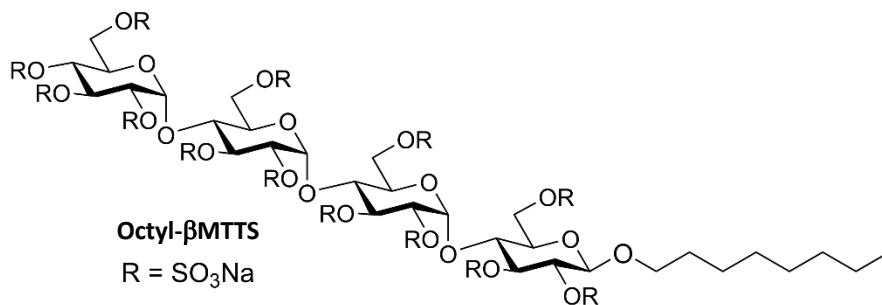

**Figure S2. Structure of octyl  $\beta$ -maltotetraoside tridecasulfate, an analogue of pixatimid without the steroid side chain.**

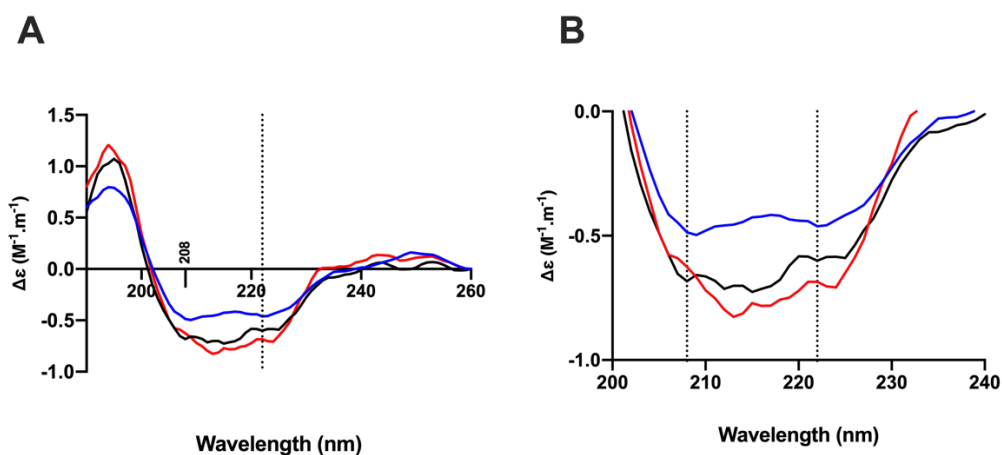

363  
364  
365 **Figure S3: The conformational change of the SARS-CoV-2 S1 RBD observed in the presence of pixatimod by**  
366 **circular dichroism (CD) spectroscopy.** (A). Circular dichroism spectra (190 - 260 nm) of SARS-CoV-2 S1 RBD  
367 alone (black solid line) and pixatimod (blue solid line) in PBS, pH 7.4. The red line represents the sum of the two  
368 individual spectra. Vertical dotted line indicates 222 nm (B) Details of the same spectra expanded between 200 and  
369 240 nm. Vertical dotted lines indicate 222 nm and 208 nm.
